# Supplementary material for: Conformation-specific spectroscopy of capped, gas-phase Aib oligomers: tests of the Aib residue as a 310-helix former
Source: Royal Society of Chemistry journal article supplement (doi:10.1039/c6cp04909e), 2016-01-01
Supplement: c6cp04909e1.pdf [file c6cp04909e1.pdf]

## Supplementary Information for:

### Conformation-specific spectroscopy of capped, gas-phase Aib oligomers:

#### Tests of the Aib residue as a $3_{10}$ -helix former

Joseph R. Gord<sup>a</sup>, Daniel M. Hewett<sup>a</sup>, Alicia O. Hernandez-Castillo<sup>a</sup>, Karl N. Blodgett<sup>a</sup>,

Matthew C. Rotondaro<sup>b</sup>, Adalgisa Varuolo<sup>b</sup>, Matthew A. Kubasik<sup>b, \*</sup>, and Timothy S. Zwier<sup>a, \*</sup>

<sup>a</sup>Department of Chemistry, Purdue University, West Lafayette, Indiana 47901 USA.

<sup>b</sup>Department of Chemistry and Biochemistry, Fairfield University, Fairfield, Connecticut 06824  
USA

**KEYWORDS:** *Peptide folding, Helix Macrodipole,  $3_{10}$ -Helices, Single-conformation spectroscopy*

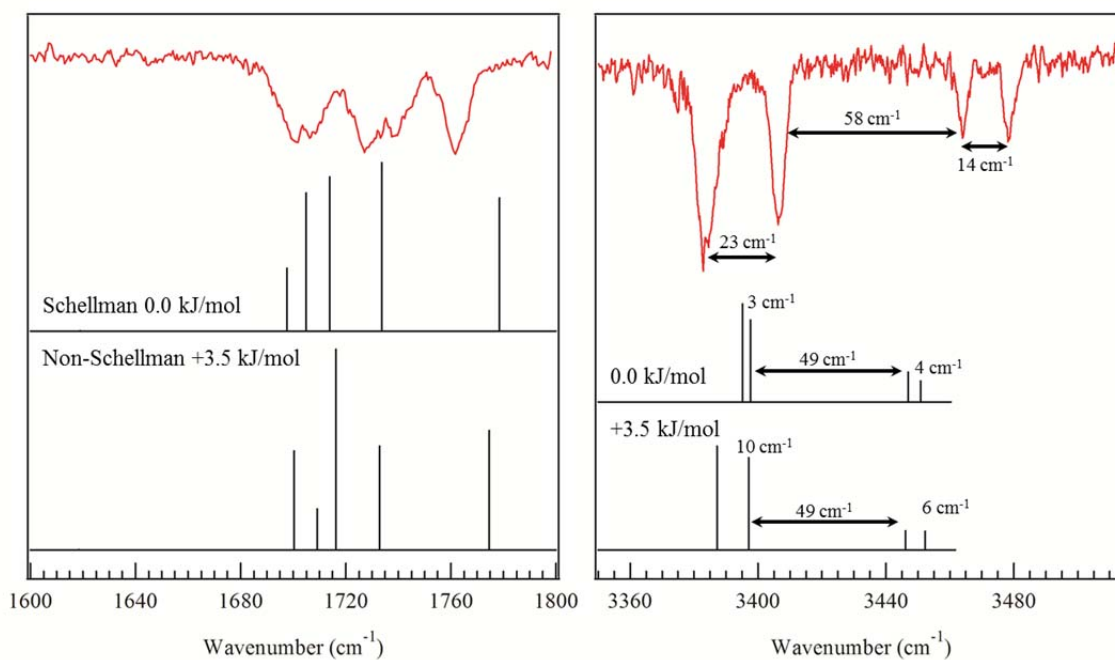

Figure S1: Presented here are the two lowest energy fits for conformer A of Z-(Aib)<sub>4</sub>-OMe. Both structures adopt F-F-10-10 conformations. The splittings between individual transitions have been given in wavenumbers. The primary structural difference between the two is incorporation of the Schellman Motif<sup>29</sup> in the lower energy structure. Because of the energetic and spectroscopic similarity, we do not make a definitive assignment. However, the +3.5 kJ/mol structure is favored based on slightly better spectroscopic agreement.
